# Supplementary material for: The impact of Hubbard and van der Waals corrections on the DFT calculation of epsilon–zeta transition pressure in solid oxygen
Source: Royal Society of Chemistry journal article supplement (doi:10.1039/d3cp02566g), 2023-01-01
Supplement: d3cp02566g1.pdf [file d3cp02566g1.pdf]

Supplementary for

**The impact of Hubbard- and van der Waals-corrections on the DFT calculation of epsilon-zeta transition pressure in solid oxygen**

Le The Anh<sup>a\*</sup>

<sup>a</sup>Institute for Solid State Physics, The University of Tokyo, Kashiwa-no-ha, Kashiwa, Chiba, 277-8581 Japan.

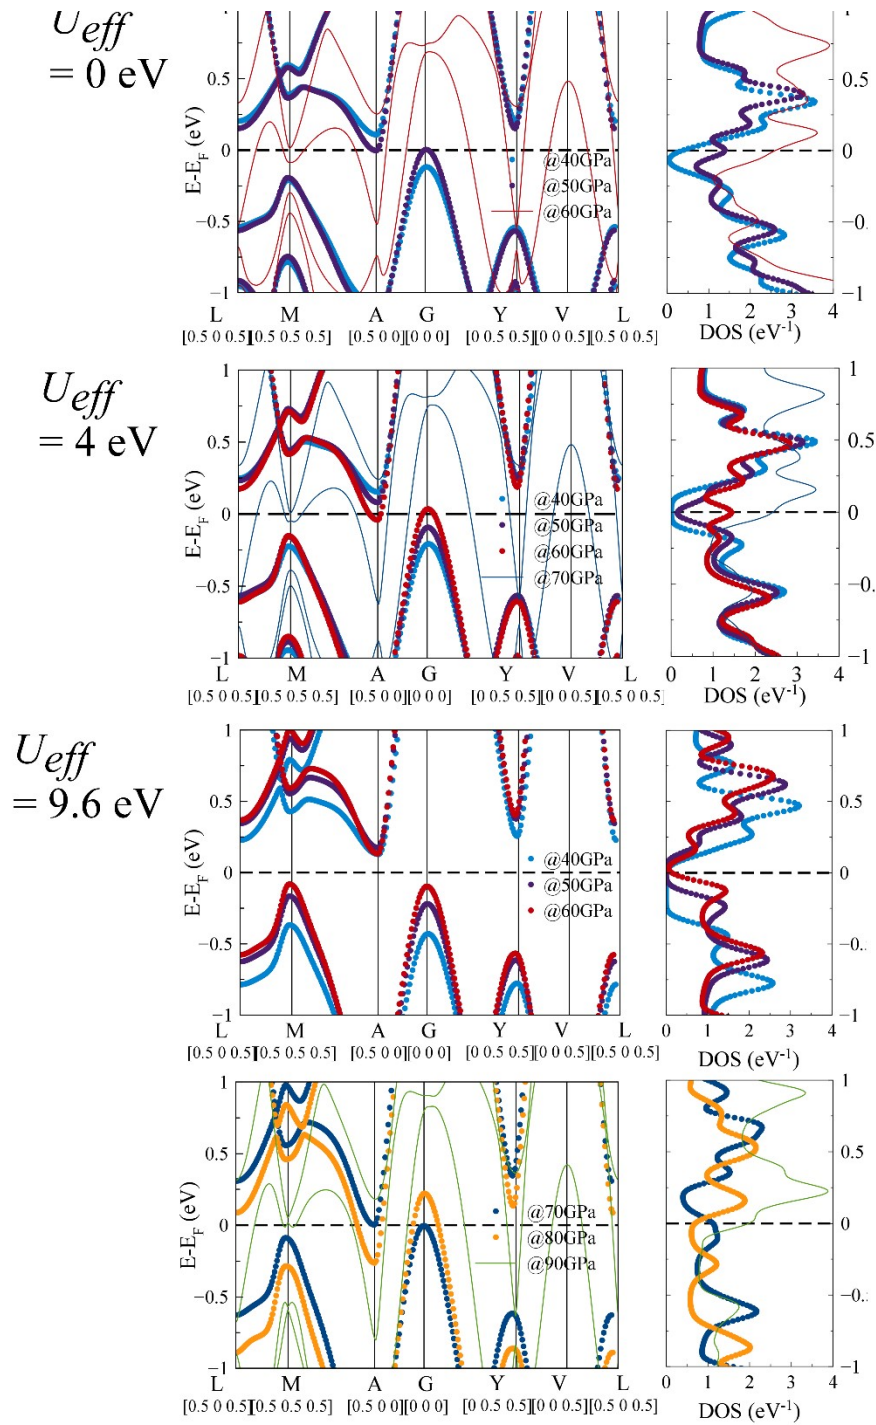

Figure S1 (Color online) The band structures and density of states of solid oxygen at various pressures calculated using PBE+vdW-D+U with  $U_{eff} = 0, 4, \text{ and } 9.6 \text{ eV}$ . The epsilon phase is plotted with dots while the zeta phase is plotted with thin solid lines.
